# Supplementary material for: A Case Series of Metastatic Malignant Gastrointestinal Neuroectodermal Tumors and Comprehensive Genomic Profiling Analysis of 20 Cases
Source: MDPI journal article supplement (doi:10.3390/curroncol29020109), 2022-02-21
Supplement: s1 [file s1]

*Supplementary Material*

# A Case Series of Metastatic Malignant Gastrointestinal Neuroectodermal Tumors and Comprehensive Genomic Profiling Analysis of 20 Cases

Taylor Kandler <sup>1,†</sup>, Eliane Cortez <sup>2,†</sup>, Lani Clinton <sup>3</sup>, Amanda Hemmerich <sup>3</sup>, Osama Ahmed <sup>4</sup>, Ralph Wong <sup>5</sup>, Taylor Forns <sup>6</sup>, Andrea J. MacNeill <sup>7</sup>, Trevor D. Hamilton <sup>7</sup>, Mohammadali Khorasani <sup>7</sup> and Xiaolan Feng <sup>1,8,9,\*</sup>

<sup>1</sup> Department of Medicine, University of British Columbia, Vancouver, BC V6T 1Z3, Canada; kandler.taylor@gmail.com

<sup>2</sup> Foundation Medicine, Inc., Cambridge, MA 02141, USA; ecortez@foundationmedicine.com

<sup>3</sup> Foundation Medicine, Inc., Morrisville, NC 27560, USA; lclinton@foundationmedicine.com (L.C.); ahemmerich@foundationmedicine.com (A.H.)

<sup>4</sup> Department of Medical Oncology, Saskatoon Cancer Center, Saskatoon, SK S7N 4H4, Canada; osama.ahmed@saskcancer.ca

<sup>5</sup> Department of Medical Oncology, Cancer Care Manitoba, Manitoba, Winnipeg, MB R3E 0V9, Canada; rwong2@cancercare.mb.ca

<sup>6</sup> Department of Pathology, Duke University, Durham, NC 27710, USA; taylor.forns@duke.edu

<sup>7</sup> Department of Surgery, University of British Columbia, Vancouver, BC V5Z 1M9, Canada; andrea.macneill@bccancer.bc.ca (A.J.M.); trevor.hamilton@vch.ca (T.D.H.); kh.sohrab@gmail.com (M.K.)

<sup>8</sup> Department of Medical Oncology, Tom Baker Cancer Center, Calgary, AB T2N 4N2, Canada

<sup>9</sup> Cumming School of Medicine, University of Calgary, Calgary, AB T2N 4N1, Canada

\* Correspondence: fxiaolan@ucalgary.ca

† These authors contributed equally to this work.

**Citation:** Kandler, T.; Cortez, E.; Clinton, L.; Hemmerich, A.; Ahmed, O.; Wong, R.; Forns, T.; MacNeill, A.J.; Hamilton, T.; Khorasani, M.; et al. A Case Series of Metastatic Malignant Gastrointestinal Neuroectodermal Tumors and Comprehensive Genomic Profiling Analysis of 20 Cases. *Curr. Oncol.* **2022**, *29*, 1279–1297. <https://doi.org/10.3390/curroncol29020109>

Received: 15 December 2021

Accepted: 14 February 2022

Published: 21 February 2022

**Publisher's Note:** MDPI stays neutral with regard to jurisdictional claims in published maps and institutional affiliations.

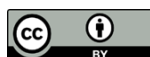

**Copyright:** © 2022 by the authors. Licensee MDPI, Basel, Switzerland. This article is an open access article distributed under the terms and conditions of the Creative Commons Attribution (CC BY) license (<https://creativecommons.org/licenses/by/4.0/>).

**Table S1.** Detailed information of the 20 cases sequenced at Foundation Medicine. NA when not reported as being performed.

| Case | Specimen Site             | Gender | Age | TMB | MSI Status       | IHC      |          |                          |                |          | FISH<br>EWSR1 | NGS<br>EWSR1<br>Partner<br>Gene |
|------|---------------------------|--------|-----|-----|------------------|----------|----------|--------------------------|----------------|----------|---------------|---------------------------------|
|      |                           |        |     |     |                  | HMB-45   | MelanA   | Melano<br>ma<br>Cocktail | S-100          | SOX10    |               |                                 |
| 1    | Liver                     | female | 43  | 1.3 | MSS              | NA       | NA       | Negative                 | Positive       | NA       | NA            | CREB1                           |
| 2    | Small Intestine           | female | 43  | 1.3 | MSS              | Negative | NA       | NA                       | Positive       | Positive | Positive      | ATF1                            |
| 3    | Small Intestine           | female | 15  | 1.3 | MSS              | NA       | NA       | Negative                 | Positive       | Negative | Positive      | FLI1                            |
| 4    | Small Intestine           | female | 31  | 1.6 | MSS              | Negative | Negative | NA                       | Positive       | Positive | Positive      | CREB1                           |
| 5    | Liver                     | male   | 61  | 0   | MSS              | Negative | NA       | NA                       | Positive       | Positive | Positive      | CREB1                           |
| 6    | Small Intestine           | female | 64  | 1.2 | Not<br>Performed | NA       | Negative | Negative                 | Positive       | NA       | Positive      | CREB1                           |
| 7    | Liver                     | female | 48  | 3.5 | MSS              | NA       | NA       | NA                       | Borderlin<br>e | Positive | NA            | ATF1                            |
| 8    | Small Intestine           | female | 24  | 0.9 | MSS              | Negative | Negative | NA                       | Positive       | NA       | Positive      | Not<br>identified               |
| 9    | Small Intestine           | male   | 37  | 0.8 | MSS              | NA       | NA       | NA                       | NA             | NA       | NA            | CREB1                           |
| 10   | Small Intestine           | male   | 18  | 4   | MSS              | NA       | Negative | NA                       | Positive       | NA       | Positive      | ATF1                            |
| 11   | Liver                     | female | 63  | 0.8 | MSS              | NA       | NA       | NA                       | NA             | NA       | Positive      | CREB1                           |
| 12   | Stomach                   | female | 45  | 1.6 | MSS              | NA       | NA       | NA                       | NA             | NA       | NA            | ATF1                            |
| 13   | Appendix                  | male   | 29  | 0.8 | MSS              | Negative | NA       | NA                       | Positive       | NA       | Positive      | ATF1                            |
| 14   | Small Intestine           | female | 39  | 0.8 | MSS              | NA       | Negative | NA                       | Positive       | NA       | NA            | ATF1                            |
| 15   | Soft tissue               | male   | 19  | 0   | MSS              | NA       | NA       | NA                       | NA             | NA       | NA            | CREB1                           |
| 16   | Abdomen                   | female | 15  | 0   | MSS              | Negative | NA       | NA                       | Positive       | Positive | NA            | ATF1                            |
| 17   | Diaphragm                 | female | 38  | 0   | MSS              | NA       | NA       | NA                       | NA             | NA       | NA            | FLI1                            |
| 18   | Small Intestine           | female | 15  | 0.8 | MSS              | Negative | Negative | NA                       | Positive       | Positive | Positive      | ATF1                            |
| 19   | Extrahepatic bile<br>duct | female | 35  | 1.3 | MSS              | Negative | Negative | NA                       | Positive       | Positive | Positive      | ATF1                            |
| 20   | Chest wall                | male   | 51  | 1.6 | MSS              | NA       | NA       | NA                       | NA             | Positive | NA            | ATF1                            |
